# Supplementary material for: Nickel-adsorbed two-dimensional Nb2C MXene for enhanced energy storage applications
Source: PubMed Central journal article supplement (PMC8981252; doi:10.1039/d2ra00014h), 2022-02-08
Supplement: RA-012-D2RA00014H-s001.pdf [file RA-012-D2RA00014H-s001.pdf]

## Supplementary materials

# Nickel-adsorbed Two-dimensional Nb<sub>2</sub>C MXene for Enhanced Energy Storage Applications

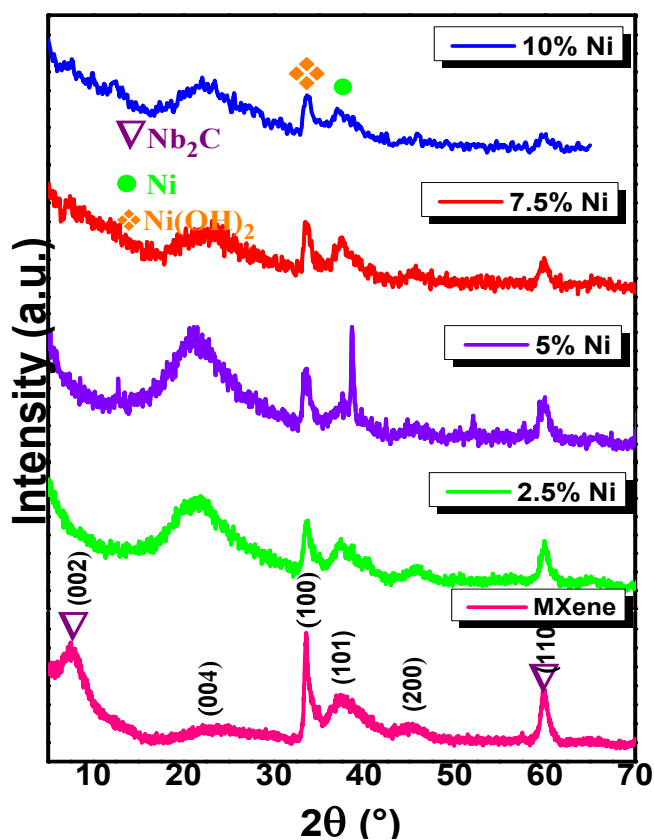

Figure S1: XRD patterns for MXene and Ni doped MXene

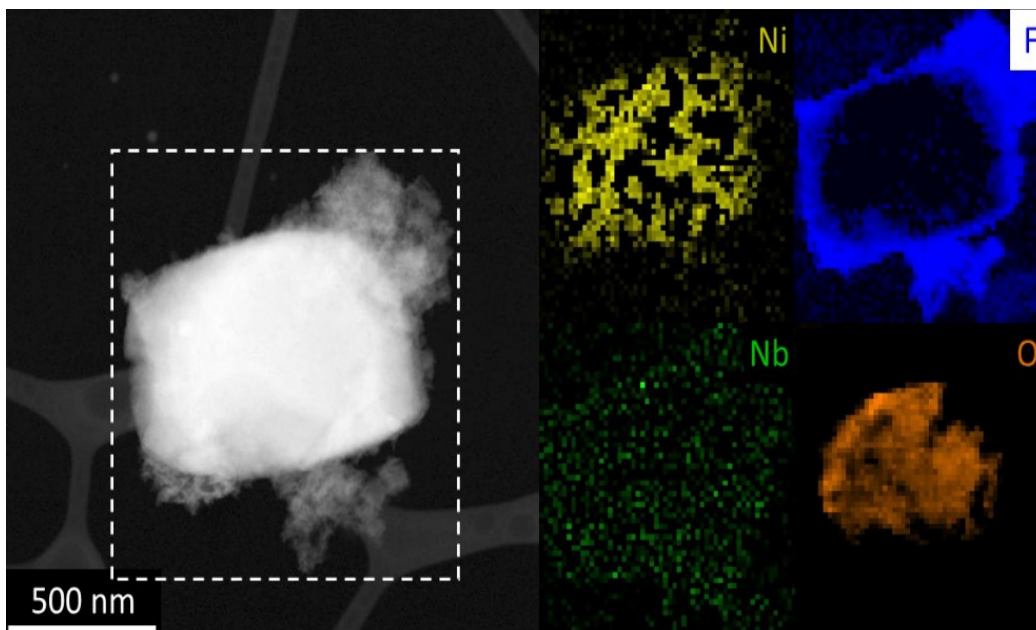

**Figure S2: STEM-EELS mapping of Nb<sub>2</sub>CT<sub>x</sub> MXene**

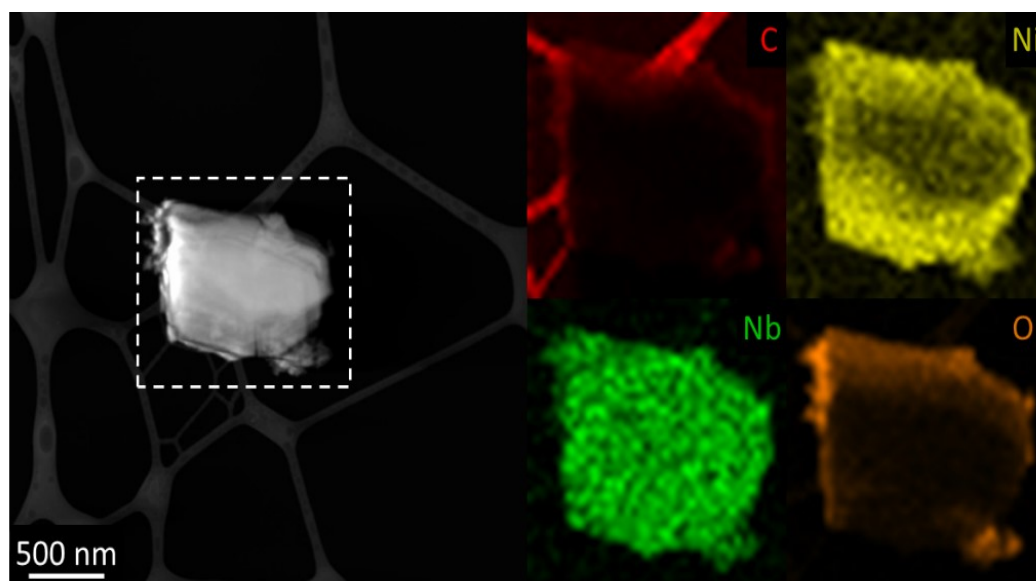

**Figure S3: STEM-EDS mapping of Nb<sub>2</sub>CT<sub>x</sub> MXene**

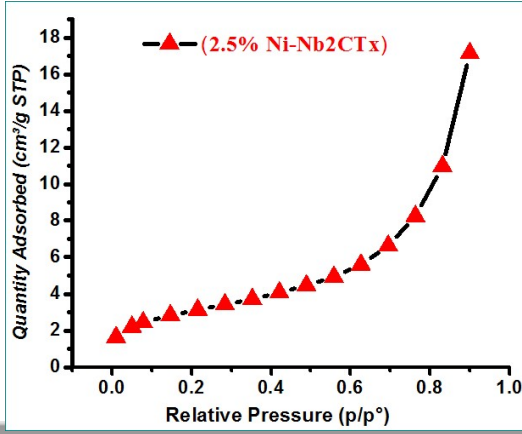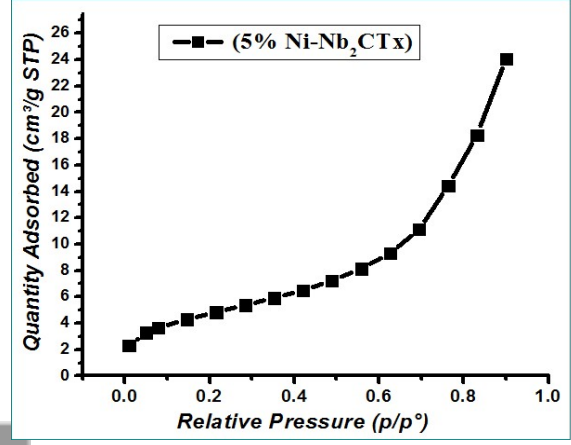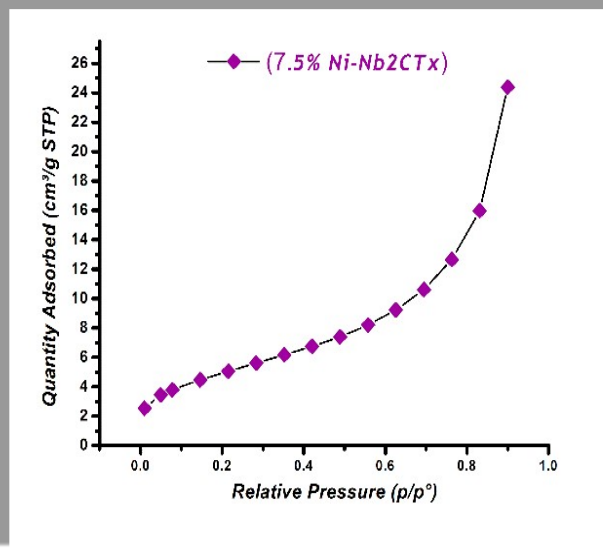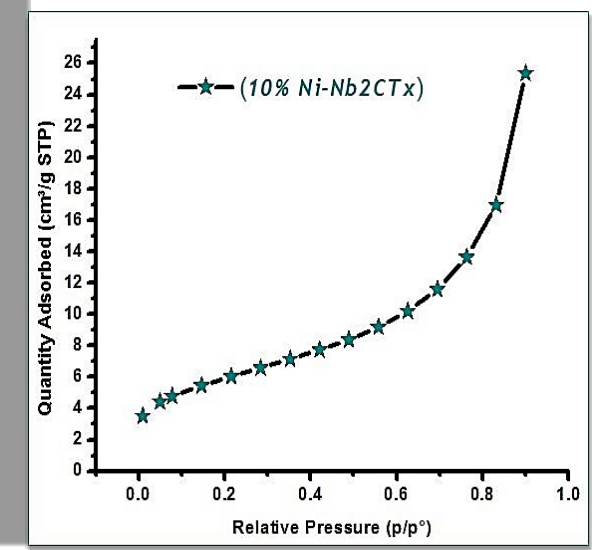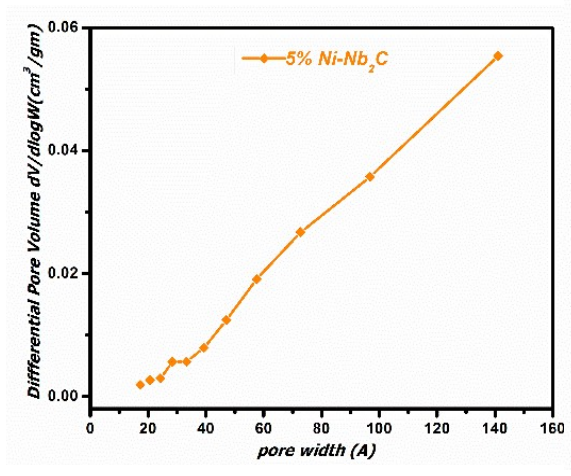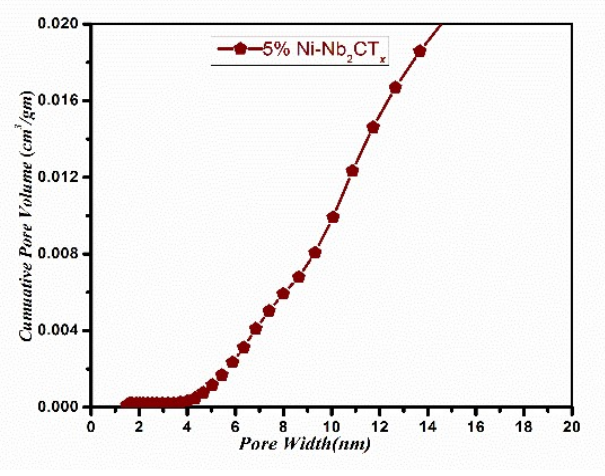

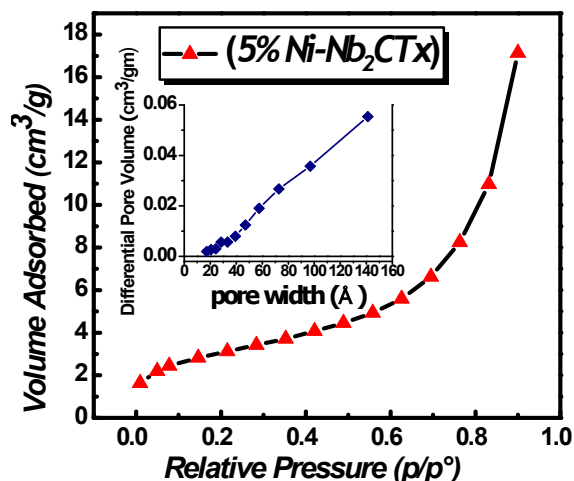

Figure S4: BET Isotherms of MAX and Ni-doped MXene a) 2.5% Ni b) 5% Ni c) 7.5% Ni d) 10% Ni e) differential pore volume VS. Pore width f) cumulative pore volume VS. Pore width

| Ni doping % | BET surface area (m <sup>2</sup> /g) | Langmuir surface area (m <sup>2</sup> /g) | Average particle size (Å) |
|-------------|--------------------------------------|-------------------------------------------|---------------------------|
| 0           | 5.2149                               | 7.6432                                    | 11505.508                 |
| 2.5%        | 10.9033                              | 15.7189                                   | 5502.920                  |
| 5%          | 17.2017                              | 24.9932                                   | 3488.020                  |
| 7.5%        | 17.9022                              | 25.9701                                   | 3351.536                  |
| 10%         | 18.0221                              | 26.3122                                   | 3247.5020                 |

Table S1: BET analysis of MXenes

### Fourier Transform Infrared Spectroscopy (FTIR)

Fourier Transform Infrared Spectroscopy (FTIR) spectra of MXene and Ni-doped Nb<sub>2</sub>CT<sub>x</sub> (Ni =2.5%, 5%, 7.5%, 10%), in the range 500—4500cm<sup>-1</sup> are shown in Fig. S10. There is a significant shift in all the characteristics peaks towards higher wave number which can be ascribed as the difference in the bond length between Nb, Ni, and C atoms. The peak around 2329 cm<sup>-1</sup> is considered as the characteristic peak of MXene (Rafiq et al. 2020). The small peak at 2113 cm<sup>-1</sup> is because of stretching adsorption of C≡C bonds (Luo et al. 2016). Slight humps at 1435 cm<sup>-1</sup>, 3300 cm<sup>-1</sup> and 4000 cm<sup>-1</sup> are for NH<sub>4</sub>, N-H and OH groups. The peaks between 550-900 cm<sup>-1</sup> show typical peaks of Nb-O bands (Castro et al. 2016). Thus, FTIR analysis confirms the efficacious doping of Nickel ions into Niobium Carbide MXene.

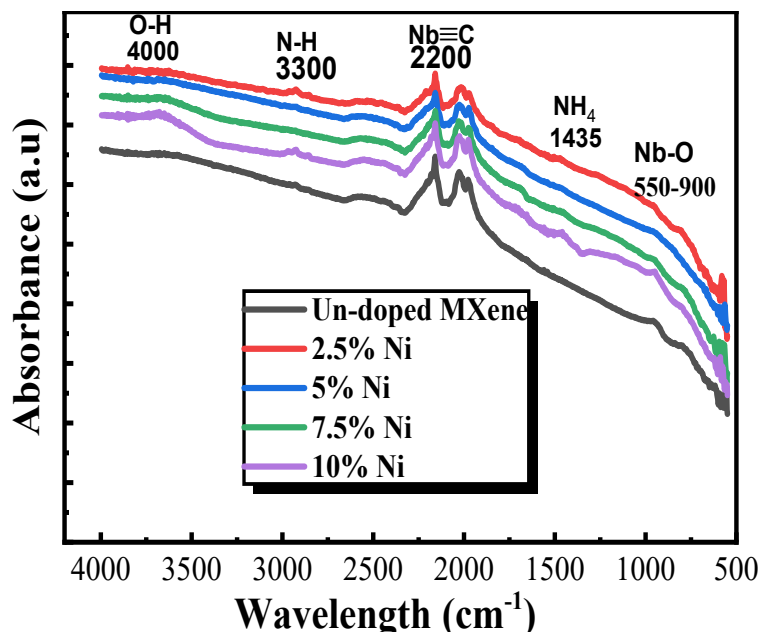

**Figure S5: FTIR spectra of pristine MXene and Ni-doped MXene.**

## References:

- 1) Castro, Douclasse C., Rodrigo P. Cavalcante, Juliana Jorge, Marco A.U. Martines, Lincoln C.S. Oliveira, Gleison A. Casagrande, and Amilcar Machulek. 2016. "Synthesis and Characterization of Mesoporous Nb<sub>2</sub>O<sub>5</sub> and Its Application for Photocatalytic Degradation of the Herbicide Methylviologen." *Journal of the Brazilian Chemical Society* 27 (2): 303–13. <https://doi.org/10.5935/0103-5053.20150244>.
- 2) Luo, Jianmin, Xinyong Tao, Jun Zhang, Yang Xia, Hui Huang, Liyuan Zhang, Yongping Gan, Chu Liang, and Wenkui Zhang. 2016. "Sn<sup>4+</sup> Ion Decorated Highly Conductive Ti<sub>3</sub>C<sub>2</sub> MXene: Promising Lithium-Ion Anodes with Enhanced Volumetric Capacity and Cyclic Performance." *ACS Nano* 10 (2): 2491–99. <https://doi.org/10.1021/acsnano.5b07333>.
- 3) Rafiq, Sunaina, Saif Ullah Awan, Ren Kui Zheng, Zhenchao Wen, Malika Rani, Deji Akinwande, and Syed Rizwan. 2020. "Novel Room-Temperature Ferromagnetism in Gd-Doped 2-Dimensional Ti<sub>3</sub>C<sub>2</sub>T<sub>x</sub> MXene Semiconductor for Spintronics." *Journal of Magnetism and Magnetic Materials* 497: 165954. <https://doi.org/10.1016/j.jmmm.2019.165954>.
